# Supplementary material for: Nafamostat has anti-asthmatic effects associated with suppressed pro-inflammatory gene expression, eosinophil infiltration and airway hyperreactivity
Source: Front Immunol. 2023 Apr 21;14:1136780. doi: 10.3389/fimmu.2023.1136780 (PMC10160450; doi:10.3389/fimmu.2023.1136780)
Supplement: Supplementary file 3 [file Table_2.xls]

## Sheet: Supplementary table 2
Supplementary Table 2: Differentially expressed genes in HDM-sensitized/nafamostat-treated vs HDM-sensitized mice
Gene	baseMean	log2FoldChange	lfcSE	stat	pvalue	padj
Ear6	1234.89	-2.12068	0.186636	-11.3626	6.42e-30	7.23e-26
Clec7a	14583.3	-1.31049	0.144572	-9.06461	1.25e-19	7.04e-16
Ccl8	6584.7	-1.54181	0.174883	-8.81625	1.18e-18	4.44e-15
Wfdc17	2064.34	-1.22092	0.156473	-7.80271	6.06e-15	1.7e-11
Uqcrq	911.532	-1.46441	0.191972	-7.62826	2.38e-14	5.36e-11
Rnase2a	7994.84	-1.19727	0.160903	-7.44095	1e-13	1.88e-10
Fbp1	518.622	-1.82402	0.252405	-7.22656	4.95e-13	7.96e-10
Dbi	2383.04	-1.38855	0.194154	-7.15179	8.57e-13	1.16e-09
Uqcrh	2679.53	-1.00896	0.141297	-7.14073	9.28e-13	1.16e-09
Prg2	313.586	-1.38858	0.197449	-7.03259	2.03e-12	2.28e-09
Cxcr6	244.667	-1.42906	0.206364	-6.92496	4.36e-12	3.78e-09
Ndufb8	761.004	-1.53376	0.221356	-6.92893	4.24e-12	3.78e-09
Rwdd1	670.78	-1.03843	0.150359	-6.90633	4.97e-12	4e-09
Rnf7	255.284	-1.52454	0.223227	-6.82957	8.52e-12	5.99e-09
Arpc1b	1226.95	-1.1136	0.16416	-6.78364	1.17e-11	7.76e-09
Tmsb4x	76568.7	-1.00987	0.157313	-6.41952	1.37e-10	6.99e-08
Hist1h1d	3123.38	-1.07792	0.168672	-6.39064	1.65e-10	7.75e-08
Ccl11	663.153	-1.13203	0.179111	-6.32029	2.61e-10	1.18e-07
Il17a	53.7617	-2.72121	0.433764	-6.27349	3.53e-10	1.47e-07
Ngdn	63.0413	-2.37312	0.380821	-6.23161	4.62e-10	1.86e-07
Serpina3g	1204.89	-1.08624	0.17785	-6.10765	1.01e-09	3.79e-07
Ccl9	7925.93	-1.01177	0.16634	-6.08255	1.18e-09	4.29e-07
Tomm22	404.516	-1.15469	0.197288	-5.85281	4.83e-09	1.55e-06
H2-Ab1	76.1876	-2.12611	0.366329	-5.80381	6.48e-09	1.97e-06
Fxyd4	306.285	-1.17747	0.204831	-5.74849	9e-09	2.6e-06
H2-Q5	499.817	-1.09608	0.191346	-5.72826	1.01e-08	2.85e-06
Chordc1	266.539	-1.13961	0.202685	-5.62258	1.88e-08	5.04e-06
Slc26a4	772.999	-1.11678	0.200755	-5.56292	2.65e-08	6.56e-06
Trappc2l	306.101	-1.07933	0.194085	-5.56111	2.68e-08	6.56e-06
Cd84	142.748	-1.51486	0.272751	-5.55399	2.79e-08	6.69e-06
Hsd17b10	501.161	-1.25411	0.230092	-5.45047	5.02e-08	1.07e-05
Akirin1	228.27	-1.08776	0.199781	-5.44476	5.19e-08	1.08e-05
Snord118	54.6616	-2.23038	0.410642	-5.43146	5.59e-08	1.11e-05
Scube2	480.278	1.20437	0.222033	5.42428	5.82e-08	1.11e-05
Tnxb	293.241	1.11302	0.208741	5.33206	9.71e-08	1.66e-05
Hist1h2bb	1722.2	-1.06316	0.20064	-5.29885	1.17e-07	1.93e-05
Ndufb6	527.132	-1.14982	0.216964	-5.29957	1.16e-07	1.93e-05
Rpa3	291.313	-1.31935	0.250423	-5.26847	1.38e-07	2.21e-05
Lgals3	1855.18	-1.03191	0.197138	-5.23443	1.65e-07	2.55e-05
Ms4a7	193.186	-1.60577	0.306748	-5.23482	1.65e-07	2.55e-05
Abca8a	472.905	1.08483	0.207443	5.22955	1.7e-07	2.58e-05
Rgs1	124.506	-1.7528	0.342434	-5.11864	3.08e-07	4.22e-05
Nudt8	37.2318	-2.51085	0.495704	-5.06522	4.08e-07	5.22e-05
Mgat1	319.839	-1.27379	0.251684	-5.06108	4.17e-07	5.27e-05
AA467197	557.083	-1.22428	0.24307	-5.03673	4.74e-07	5.86e-05
Prkcdbp	115.098	-1.35567	0.269953	-5.02188	5.12e-07	6.08e-05
Tmem154	226.573	-1.13408	0.226728	-5.00194	5.68e-07	6.62e-05
Cbr1	278.902	-1.18964	0.238806	-4.98163	6.31e-07	7.1e-05
Trem2	581.367	-1.02501	0.206504	-4.96361	6.92e-07	7.48e-05
Pdcd1lg2	260.418	-1.1147	0.227227	-4.90568	9.31e-07	9.42e-05
Ramp1	323.805	-1.13738	0.23191	-4.90442	9.37e-07	9.42e-05
Gm10499	291.863	-1.11112	0.227789	-4.87785	1.07e-06	0.000105885
AI413582	200.101	-1.04968	0.216474	-4.84901	1.24e-06	0.00012088
Fam96a	95.2967	-1.56293	0.322547	-4.84559	1.26e-06	0.000121435
Mrps18a	134.435	-1.36115	0.282116	-4.8248	1.4e-06	0.000132551
Mrpl21	223.176	-1.28392	0.268928	-4.77419	1.8e-06	0.000163294
Ankrd55	58.5708	-2.23521	0.471451	-4.74112	2.13e-06	0.000183217
Insig2	159.889	-1.29484	0.2756	-4.69826	2.62e-06	0.000220384
Klc1	343.242	-1.09582	0.235623	-4.65072	3.31e-06	0.000262171
Snx9	237.496	-1.14056	0.249352	-4.57409	4.78e-06	0.000358874
Serpinb2	50.5823	-1.76023	0.385273	-4.56879	4.91e-06	0.000365601
Slc35a3	282.541	-1.09703	0.241236	-4.54754	5.43e-06	0.000399275
Mzb1	438.369	-1.11921	0.247674	-4.51889	6.22e-06	0.000437283
Terc	47.8709	-1.75541	0.389213	-4.51017	6.48e-06	0.000452834
Pdcd1	194.592	-1.20031	0.267	-4.49554	6.94e-06	0.000476239
Rnf187	185.452	-1.08363	0.243744	-4.44578	8.76e-06	0.000565108
Tm4sf19	64.3958	-2.26629	0.5112	-4.43326	9.28e-06	0.000590207
Clec4a3	243.019	-1.14048	0.261902	-4.3546	1.33e-05	0.000789682
Retnlb	132.799	-1.2488	0.288852	-4.32331	1.54e-05	0.000901012
Faim2	127.662	1.29334	0.300917	4.298	1.72e-05	0.000989653
Tex30	111.386	-1.25948	0.293563	-4.29032	1.78e-05	0.00101416
Npm1	231.896	-1.16608	0.272329	-4.28188	1.85e-05	0.00102747
Tmem5	85.7734	-1.4478	0.3383	-4.27964	1.87e-05	0.00103281
Tmem30a	203.317	-1.0409	0.2444	-4.25899	2.05e-05	0.00110587
Armc10	171.549	-1.21091	0.286416	-4.22778	2.36e-05	0.00124707
Esm1	238.642	1.34857	0.322295	4.18426	2.86e-05	0.0014241
Lpxn	160.034	-1.03222	0.247161	-4.17629	2.96e-05	0.0014496
Dnah5	191.167	1.15694	0.278871	4.14867	3.34e-05	0.00160848
Fcrla	135.386	-1.09081	0.263962	-4.13245	3.59e-05	0.00170987
Pdzk1ip1	245.053	-1.14687	0.279057	-4.1098	3.96e-05	0.00183416
Gm19990	102.178	-1.21597	0.296462	-4.10159	4.1e-05	0.00188495
Cd38	85.0729	-1.27422	0.315514	-4.03853	5.38e-05	0.00232832
Gpr153	156.58	1.07292	0.266697	4.02298	5.75e-05	0.00245923
Rpain	128.774	-1.10366	0.276172	-3.99627	6.43e-05	0.00269213
Pla2g2d	178.17	-1.26007	0.316316	-3.98359	6.79e-05	0.00278831
N4bp2l1	86.8127	-1.23312	0.309984	-3.97802	6.95e-05	0.00282346
Lrat	364.732	1.00908	0.254728	3.96142	7.45e-05	0.00294233
Smim13	112.38	-1.12899	0.2869	-3.93514	8.31e-05	0.00322701
Mmadhc	52.2586	-1.70589	0.433699	-3.93334	8.38e-05	0.00323083
Tubb4a	156.96	1.09597	0.280468	3.90765	9.32e-05	0.00347331
Snhg11	100.618	-1.08676	0.28031	-3.87701	0.000105746	0.00376636
Lrrc46	93.6835	1.11119	0.289836	3.83387	0.000126144	0.00426006
Ube2e3	42.2719	-1.70293	0.459897	-3.70284	0.0002132	0.00632862
Iah1	89.0057	-1.11671	0.303655	-3.67757	0.000235465	0.00679529
Corin	121.152	-1.06883	0.292353	-3.65596	0.000256218	0.00724555
Gria1	81.3022	1.17232	0.322656	3.63334	0.000279777	0.00766153
Egr2	35.4887	-1.61258	0.444968	-3.62405	0.00029003	0.00778259
Zfp568	123.415	-1.04767	0.289492	-3.619	0.000295748	0.00790652
Ccl20	52.089	-1.52544	0.421776	-3.6167	0.000298382	0.0079305
Tmem62	57.7734	-1.3679	0.379127	-3.60802	0.000308543	0.00811366
Glt8d1	88.7316	-1.16446	0.324755	-3.58566	0.000336228	0.00865564
Chst3	99.022	1.05349	0.296213	3.55653	0.000375784	0.00939878
Ing2	53.0315	-1.67943	0.476322	-3.52583	0.000422165	0.0101185
Gatsl2	94.6813	1.01131	0.287413	3.51867	0.000433722	0.0102986
Fabp1	72.1244	-1.26762	0.364455	-3.47814	0.000504909	0.0114111
Il11ra1	39.1964	-1.57001	0.453082	-3.46519	0.000529866	0.0118326
Ptpru	116.688	1.03364	0.298553	3.46216	0.000535867	0.0118958
Pnpo	162.258	-1.0012	0.289308	-3.46068	0.000538816	0.0119091
Fut8	97.0987	-1.19931	0.347203	-3.45419	0.000551939	0.0120735
Tmem135	97.896	-1.13718	0.329497	-3.45126	0.000557969	0.0121469
Socs2	38.9544	-1.58521	0.4598	-3.4476	0.000565589	0.0122182
Ankrd37	46.0326	-1.3625	0.402581	-3.38441	0.000713304	0.0144134
Cox6b2	120.596	-1.01864	0.30249	-3.36753	0.000758438	0.0150817
Syngr1	99.8787	-1.11731	0.331906	-3.36634	0.00076172	0.0150936
Zfp874a	43.3306	-1.46567	0.44169	-3.31832	0.000905599	0.0168471
Mucl1	42.8313	-1.352	0.411448	-3.28595	0.0010164	0.0184808
Mmp13	52.3762	-1.61979	0.494497	-3.27563	0.00105427	0.0188048
Ly6d	85.1807	-1.03864	0.317456	-3.27176	0.00106879	0.0189736
Gm15056	76.2201	-1.3366	0.41643	-3.20967	0.0013289	0.0224575
3110056K07Rik	40.0696	-1.45744	0.459794	-3.16978	0.00152556	0.0249567
Rab29	107.158	-1.13051	0.357319	-3.16387	0.00155688	0.0252852
AI662270	66.2165	-1.25363	0.397008	-3.1577	0.00159019	0.0254863
Acaca	50.0539	-1.257	0.400077	-3.14188	0.00167866	0.0263138
Col12a1	86.6377	1.12142	0.357691	3.13516	0.0017176	0.0267294
Tril	64.7069	1.16331	0.376149	3.09269	0.00198349	0.0294903
Rprl2	42.9341	-1.24207	0.407847	-3.04543	0.00232345	0.0333126
BC048546	108.596	1.25403	0.41486	3.02279	0.00250455	0.0351043
Colgalt2	57.6489	1.17062	0.387891	3.01791	0.00254524	0.0354978
Tgoln1	48.5342	-1.25052	0.415773	-3.00771	0.00263227	0.0365756
Nsmf	103.8	-1.0317	0.343847	-3.00045	0.00269577	0.0370915
Mettl21e	51.7473	-1.28769	0.429252	-2.99985	0.0027011	0.0371196
Il1rl2	84.9015	-1.02246	0.343313	-2.97822	0.00289931	0.0388473
Dusp12	74.923	-1.04584	0.351602	-2.97451	0.00293458	0.039055
Chrm3	48.6406	1.14041	0.385419	2.95888	0.00308754	0.0399888
Scoc	62.3186	-1.04349	0.355809	-2.93274	0.00335989	0.0418314
Tor2a	64.0196	-1.1139	0.379782	-2.93299	0.0033571	0.0418314
Adtrp	51.4504	-1.22398	0.419825	-2.91545	0.0035518	0.0433574
Ppa2	50.2156	-1.32186	0.456029	-2.89863	0.00374803	0.0447111
Mmp12	4943.33	-1.82469	0.63243	-2.8852	0.00391159	0.0459135
